# Supplementary material for: The Cell Death Triggered by the Nuclear Localized RxLR Effector PITG_22798 from Phytophthora infestans Is Suppressed by the Effector AVR3b
Source: PubMed Central journal article supplement (PMC5343943; doi:10.3390/ijms18020409), 2017-02-14
Supplement: ijms-18-00409-s001.pdf [file ijms-18-00409-s001.pdf]

## Supplementary Materials: The Cell Death Triggered by the Nuclear Localized RxLR Effector PITG\_22798 from *Phytophthora infestans* Is Suppressed by the Effector AVR3b

Hongyang Wang, Yajuan Ren, Jing Zhou, Juan Du, Juan Hou, Rui Jiang, Haixia Wang, Zhendong Tian and Conghua Xie

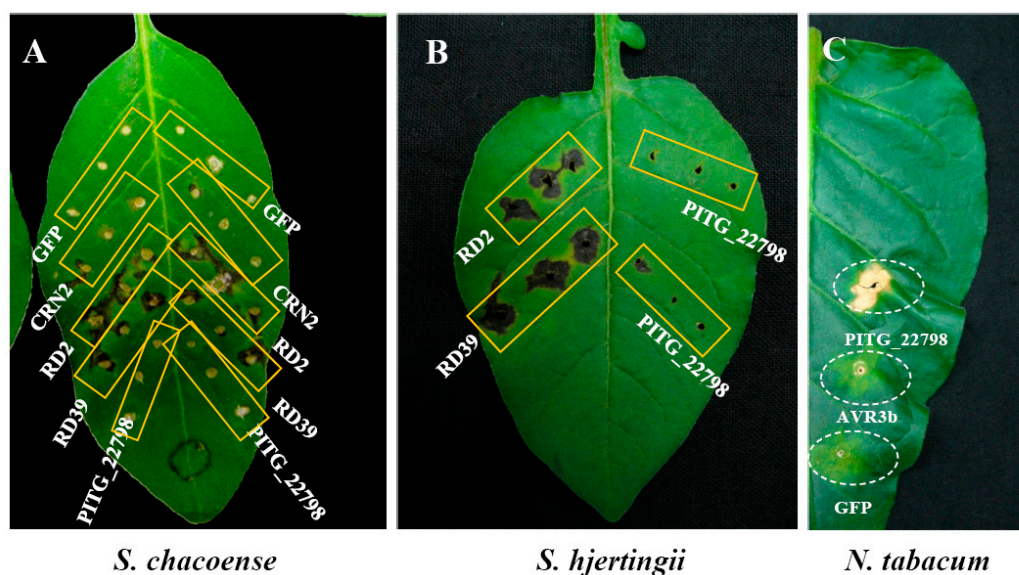

**Figure S1.** Functional screening of *P. infestans* effectors in wild potato species *S. chacoense*, *S. hjertingii*, and *N. tabacum*. *Agrobacterium* clones expressing *RD2*, *RD39*, and *PITG\_22798* of *P. infestans* were tooth-pick inoculated in leaves of *S. chacoense* (A) and *S. hjertingii* (B). *CRN2* (crinkling and necrosis induced protein gene 2) was used as a positive control and *GFP* (green fluorescent protein gene) was used as a negative control. Two weeks after inoculation, the expanding cell death was photographed. (C) Leaves of *N. tabacum* were infiltrated with *A. tumefaciens* carrying *PITG\_22798*, *AVR3b*, and *GFP* (negative control). Photographs were taken 12 dpi.

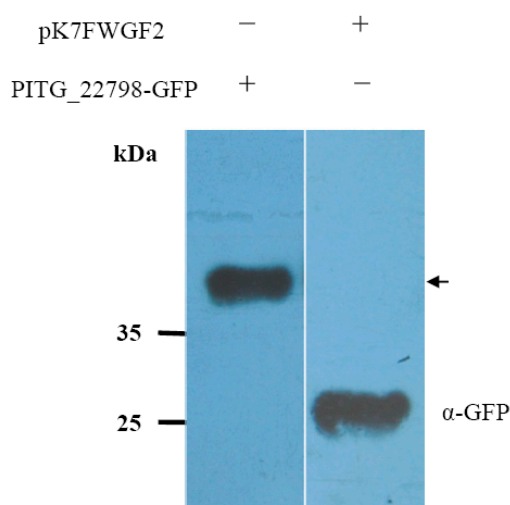

**Figure S2.** Western blot analysis of proteins *PITG\_22798*-GFP and *GFP*-empty. Immunoblots show the stability of *PITG\_22798*-GFP. Arrows indicated the expected size (43 kDa). Plus (+) and minus (-) signs indicate the presence or absence respectively.

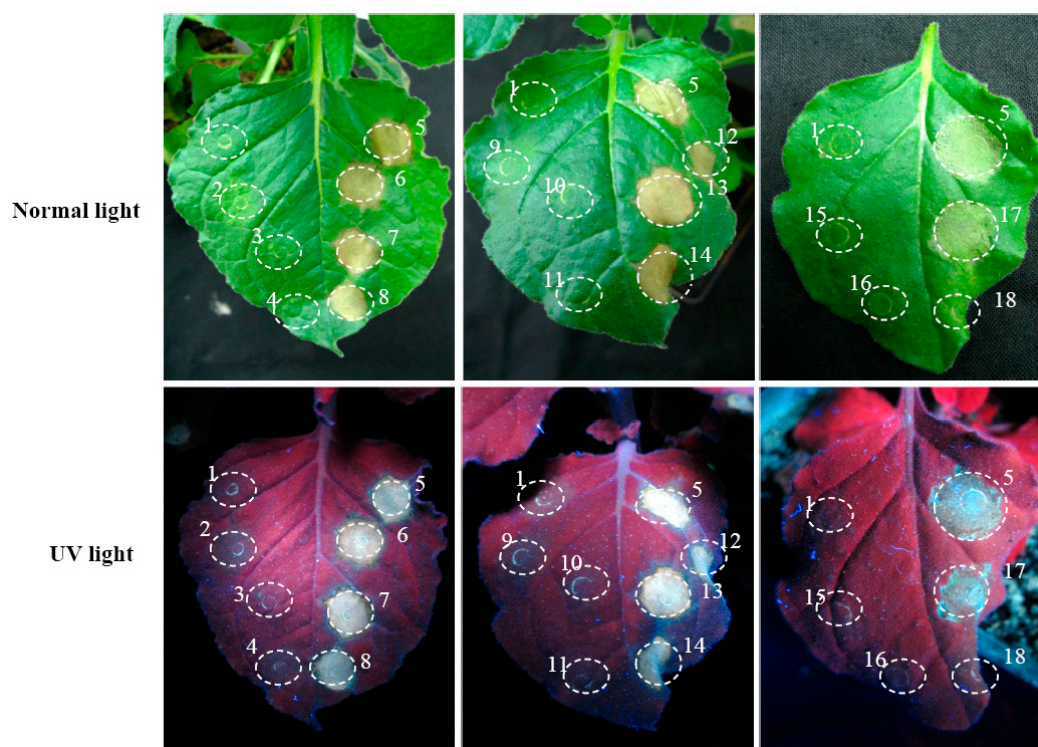

**Figure S3.** Test of effectors on the suppression of *PITG\_22798*-induced cell death. *PITG\_22798* was co-agroinfiltrated with the following effectors or controls in a 1:1 ratio with a final OD600 of about 0.4: (1) *GFP*; (2) *AVR2*; (3) *PITG\_21388*; (4) *PITG\_14783*; (5) *GFP+PITG\_22798*; (6) *AVR2 + PITG\_22798*; (7) *PITG\_21388 + PITG\_22798*; (8) *PITG\_14783 + PITG\_22798*; (9) *PITG\_20303*; (10) *PITG\_13959*; (11) *PITG\_23008*; (12) *PITG\_20303 + PITG\_22798*; (13) *PITG\_13959 + PITG\_22798*; (14) *PITG\_23008 + PITG\_22798*; (15) *AVR3a<sup>KI</sup>*; (16) *AVR3b*; (17) *AVR3a<sup>KI</sup> + PITG\_22798*; (18) *AVR3b +PITG\_22798*. Pictures were taken at 7 dpi under normal light and UV light.

**Table S1.** Primers used in vectors construction, gene cloning, and PCR.

| Primer Name                     | Gene Accession No. | Sequence (5'-3')                           | Corresponding Plasmids                     |
|---------------------------------|--------------------|--------------------------------------------|--------------------------------------------|
| PITG_22798 <sup>1-170</sup> -F  | XM_002998349       | GCGATCGATATGAGATGCTACTACGTCCTTA            | pGR106-PITG_22798 <sup>1-170</sup>         |
| PITG_22798 <sup>1-170</sup> -R  |                    | GATGCGGCCGCTTAATCGTTGGTCCTCTTCCTTT         |                                            |
| PITG_22798 <sup>23-170</sup> -F |                    | GCGATCGATATGGAAGTCAAGGCACAACAAGTTAGC       | pGR106-PITG_22798 <sup>23-170</sup>        |
| PITG_22798 <sup>23-170</sup> -R |                    | GATGCGGCCGCTTAATCGTTGGTCCTCTTCCTTT         |                                            |
| PITG_22798 <sup>40-170</sup> -F |                    | GCATCGATATGAGAGTGGAGCTATTTCTGCGTCGGA       | pGR106-PITG_22798 <sup>40-170</sup>        |
| PITG_22798 <sup>40-170</sup> -R |                    | GATGCGGCCGCTTAATCGTTGGTCCTCTTCCTTT         |                                            |
| PITG_22798 <sup>40-156</sup> -F |                    | GCATCGATATGAGAGTGGAGCTATTTCTGCGTCGGA       | pGR106-PITG_22798 <sup>40-156</sup>        |
| PITG_22798 <sup>40-156</sup> -R |                    | GATGCGGCCGCTATCAGCAGACTTTACGAAGAGCTCG      |                                            |
| PITG_22798 <sup>47-170</sup> -F |                    | GCATCGATATGCGGAATGATGAATTGGACGCTG          | pGR106-PITG_22798 <sup>47-170</sup>        |
| PITG_22798 <sup>47-170</sup> -R |                    | GATGCGGCCGCTTAATCGTTGGTCCTCTTCCTTT         |                                            |
| PITG_22798-GFP-F                |                    | AAAAAGCAGGCTTCACCATGGACTCAAGGCACAACAAGTT   | pK7FWG2-PITG_22798                         |
| PITG_22798-GFP-R                |                    | AGAAAGCTGGGTCTTAATCGTTGGTCCTCTTC           |                                            |
| ΔNLS-PITG_22798-GFP-F           |                    | AAAAAGCAGGCTTCACCATGGACTCAAGGCACAACAAGTT   | pK7FWG2-ΔNLS-PITG_22798                    |
| ΔNLS-PITG_22798-GFP-R           |                    | AGAAAGCTGGGTCTTAATCGTTATCAGCAGACTT         |                                            |
| nls-PITG_22798-GFP-F            |                    | AAAAAGCAGGCTTCACCATGGACTCAAGGCACAACAAGTT   | pB7WGF2-PITG_22798 <sup>165A166A167A</sup> |
| nls-PITG_22798-GFP-R            |                    | AGAAAGCTGGGTCTTAATCGTTGGTTGCTGCTGCTTTAGCTT |                                            |
| AVR3b-F                         | XM_002997802       | ATCCCGGATGACGTAATCGACTTCAAAGGGGGA          | pGR106-AVR3b                               |
| AVR3b-R                         |                    | GATGCGGCCGCTTAGAAATTGTTCTTTGCGGTCA         |                                            |
| PITG_23008-F                    | XM_002899560       | GCATCGATATGAATTCTGCGGTTGCGGGCAAG           | pGR106-PITG_23008                          |
| PITG_23008-R                    |                    | GATGCGGCCGCTTATTTATAACCCAGTCTCATT          |                                            |

Table S1. Cont.

| Primer Name        | Gene Accession No. | Sequence (5'-3')                    | Corresponding Plasmids |
|--------------------|--------------------|-------------------------------------|------------------------|
| PITG_21388-F       | KF154438           | CGCATCGATGGTTTCATCCAATCTCAACACCGCCG | pGR106-PITG_21388      |
| PITG_21388-R       |                    | GATGCGGCCCGCTATACGATGTCATAGCATGACA  |                        |
| TRV-NbSGT1-F       | AF494083           | GCGAATTCGGAACAAGGCCATTGAGTTA        | TRV-NbSGT1             |
| TRV-NbSGT1-R       |                    | GATGGATCCCTCCTCTGGCTTCTGGTAAA       |                        |
| TRV-NbHSP90-F      | AY368904           | GCGAATTCCTGTCTGGGAATCTCAAGC         | TRV-NbHSP90            |
| TRV-NbHSP90-R      |                    | GATGGATCCCTTCGTCAACCTCCTCTAC        |                        |
| RT-PITG_22798-F    |                    | GACTCAAGGCACAACAAGTTAGC             |                        |
| RT-PITG_22798-R    |                    | TTAATCGTTGGTCCTTCTCCTTT             |                        |
| RT-NbSGT1-F        | AF494083           | TCGCCGTTGACCTGTACTCA                |                        |
| RT-NbSGT1-R        |                    | GCAGGTGTTATCTTGCCAAACA              |                        |
| RT-NbHSP90-F       | AY368904           | ATGATTGGGCAATTGGT                   |                        |
| RT-NbHSP90-R       |                    | ACACGACGCACATACAGC                  |                        |
| Nbef-1 $\alpha$ -F | AY206004           | CCAAGCTGACTGTGCTGTCC                |                        |
| Nbef-1 $\alpha$ -R |                    | AAGCAAGCAATGCGTGCTC                 |                        |
| PiEF2-F            | XM_002901697       | TGACGCTATCGCCAAGGAATC               |                        |
| PiEF2-R            |                    | TAACGCTGAGCCGTAATGGGGG              |                        |

Underline represent restriction sites, *Cla*I site (ATCGAT), *Sma*I site (CCCGGG), *Not*I site (GCGGCCGC), *Bam*HI site (GGATCC), and *Eco*RI site (GAATTC).

**Table S2.** *Phytophthora infestans* isolates used in this study.

| Isolate    | Virulence Spectra       | Reference        |
|------------|-------------------------|------------------|
| EC1_DC2005 | 1.3.4.7.10.11           | [1]              |
| Ljx18      | 3.4.7.10.11             | [2]              |
| IPO-C      | 1.2.3.4.5.6.7.10.11     | [3]              |
| UK3928A    | 1.2.3.4.5.6.7.9.10.11   | [4]              |
| 88069      | 1.3.4.7                 | [5]              |
| PIC99183   | 1.3.4.5.7.8.10.11       | [6]              |
| HB09-41    | 1.2.3.4.5.6.7.8.9.10.11 | Unpublished data |
| HB09-21    | 1.2.3.4.5.6.7.8.9.10.11 | Unpublished data |
| HB09-23    | 1.2.3.4.5.6.7.8.9.10.11 | Unpublished data |
| HB09-16-2  | 1.2.3.4.5.6.7.8.9.10.11 | Unpublished data |
| HB09-14-2  | 1.2.3.4.5.6.7.8.9.10.11 | [2]              |

**Table S3.** The RxLR effectors used in this study.

| No. | RxLR Gene           | <i>P. infestans</i> Isolate for Cloning | Corresponding Gene |
|-----|---------------------|-----------------------------------------|--------------------|
| 1   | AVR2                |                                         | 88069              |
| 2   | AVR3a <sup>K1</sup> |                                         | 88069              |
| 3   | AVR3b               |                                         | PIC99183           |
| 4   | PITG_21388          |                                         | HB09-14-2          |
| 5   | PITG_14783          |                                         | HB09-14-2          |
| 6   | PITG_20303          |                                         | HB09-14-2          |
| 7   | PITG_23008          |                                         | 88069              |
| 8   | PITG_13959          |                                         | HB09-14-2          |
| 9   | PITG_22798          |                                         | 88069              |
| 10  | PITG_22798          |                                         | Ljx18              |
| 11  | PITG_22798          |                                         | 99183              |

The RxLR effectors were selected and cloned into the pGR106 vector according to previous studies [7,8].

## Reference

1. Armstrong, M.R.; Whisson, S.C.; Pritchard, L.; Bos, J.I.; Venter, E.; Avrova, A.O.; Rehmany, A.P.; Böhme, U.; Brooks, K.; Cherevach, I.; et al. An ancestral oomycete locus contains late blight avirulence gene *Avr3a*, encoding a protein that is recognized in the host cytoplasm. *Proc. Natl. Acad. Sci. USA*. **2005**, *102*, 7766–7771.
2. Wang, H.; Sun, C.; Jiang, R.; He, Q.; Yang, Y.; Tian, Z.; Tian, Z.; Xie, C. The dihydrolipoyl acyltransferase gene *BCE2* participates in basal resistance against *Phytophthora infestans* in potato and *Nicotiana benthamiana*. *J. Plant Physiol.* **2014**, *171*, 907–914.
3. Jo, K.R.; Arens, M.; Kim, T.Y.; Jongsma, M.A.; Visser, R.G.F.; Jacobsen, E.; Vossen, J.H. Mapping of the *S. demissum* late blight resistance gene *R8* to a new locus on chromosome IX. *Theor. Appl. Genet.* **2011**, *123*, 1331–1340.
4. Cooke, D.E.; Cano, L.M.; Raffaele, S.; Bain, R.A.; Cooke, L.R.; Etherington, G.J.; Deahl, K.L.; Farrer, R.A.; Gilroy, E.M.; Goss, E.M.; et al. Genome analyses of an aggressive and invasive lineage of the Irish potato famine pathogen. *PLoS Pathog.* **2012**, *8*, e1002940.
5. Van West, P.; de Jong, A.J.; Judelson, H.S.; Emons, A.M.; Govers, F. The *ipiO* gene of *Phytophthora infestans* is highly expressed in invading hyphae during infection. *Fungal Genet. Biol.* **1998**, *23*, 126–138.
6. Flier, W.G.; Grünwald, N.J.; Kroon, L.P.; Van Den Bosch, T.B.; Garay-Serrano, E.; Lozoya-Saldana, H.; Bonants, P.; Turkensteen, L.J. *Phytophthora ipomoeae* sp. nov., a new homothallic species causing leaf blight on *Ipomoea longipedunculata* in the Toluca Valley of central Mexico. *Mycol. Res.* **2002**, *106*, 848–856.
7. Oh, S.K.; Young, C.; Lee, M.; Oliva, R.; Bozkurt, T.O.; Cano, L.M.; Win, J.; Bos, J.I.; Liu, H.Y.; van Damme, M.; et al. In planta expression screens of *Phytophthora infestans* RXLR effectors reveal diverse phenotypes, including activation of the *Solanum bulbocastanum* disease resistance protein Rpi-blb2. *Plant Cell* **2009**, *21*, 2928–2947.
8. Haas, B.J.; Kamoun, S.; Zody, M.C.; Jiang, R.H.; Handsaker, R.E.; Cano, L.M.; Grabherr, M.; Kodira, C.D.; Raffaele, S.; Torto-Alalibo, T.; et al. Genome sequence and analysis of the Irish potato famine pathogen *Phytophthora infestans*. *Nature* **2009**, *461*, 393–398.
